# Supplementary material for: High electrochemical performance based on the TiO2 nanobelt@few-layered MoS2 structure for lithium-ion batteries
Source: Royal Society of Chemistry journal article supplement (doi:10.1039/c4nr03991b), 2014-01-01
Supplement: c4nr03991b1.pdf [file c4nr03991b1.pdf]

# High Electrochemical Performance Based on TiO<sub>2</sub> Nanobelt@Few-Layer MoS<sub>2</sub> Structure for Lithium-Ion Batteries

Minglei Mao,<sup>a,b</sup> Lin Mei,<sup>a</sup> Di Guo,<sup>a</sup> Lichen Wu,<sup>a</sup> Dan Zhang,<sup>c</sup> Qihong Li<sup>\*b</sup> and Taihong Wang<sup>\*a</sup>

<sup>a</sup> Key Laboratory for Micro-Nano Optoelectronic Devices of Ministry of Education, State Key Laboratory for Chemo/Biosensing and Chemometrics, Hunan University, Changsha 410082, P. R. China, E-mail: thwang@iphy.ac.cn

<sup>b</sup> Pen-Tung Sah Institute of Micro-Nano Science and Technology of Xiamen University, Xiamen, 361005, China. E-mail: liqihong2004@hotmail.com

<sup>c</sup> Department of Electronic Engineering, School of Information Science and Engineering, Xiamen University, Xiamen 361005, China

## Supporting Information

### Experimental Section

**Chemicals:** Titania P25 (TiO<sub>2</sub>; ca. 80% anatase and 20% rutile), sodium hydroxide (NaOH), hydrochloric acid (HCl), sulfuric acid (H<sub>2</sub>SO<sub>4</sub>), ethylene glycol (HOCH<sub>2</sub>CH<sub>2</sub>OH), sodium molybdate (Na<sub>2</sub>MoO<sub>4</sub>·2H<sub>2</sub>O) and thioacetamide (C<sub>2</sub>H<sub>5</sub>NS) were purchased from Sigma-Aldrich Co. LLC. All chemicals were used without further purification. Deionized water was used throughout this study.

**Synthesis of TiO<sub>2</sub> Nanobelts:** TiO<sub>2</sub> nanobelts with rough surface were synthesized through a simple hydrothermal procedure followed by acid corrosion treatment.<sup>1, 2</sup> In a typical reaction, 0.1 g of TiO<sub>2</sub> powder (P25) was mixed with 20 mL of 10 M NaOH aqueous solution. The mixed solution was stirred and then transferred into a Teflon-lined stainless steel autoclave, heated at 180 °C for 48 h, and then air-cooled to room temperature. The obtained Na<sub>2</sub>Ti<sub>3</sub>O<sub>7</sub> powder was washed thoroughly with deionized water followed by a filtration process. The obtained wet powder was immersed in 0.1 mol/L HCl aqueous solution for 24 h and then washed thoroughly with distilled water to obtain the H-titanate (H<sub>2</sub>Ti<sub>3</sub>O<sub>7</sub>) nanobelts. To obtain the rough surface, the H-titanate nanobelts were added into a 25 mL Teflon vessel, then filled with 0.02 M H<sub>2</sub>SO<sub>4</sub> aqueous solution up to 80% of the total volume and maintained at 100 °C for 12 h. Finally, the products were isolated from the solution by centrifugation and sequentially washed with deionized water for several times, and dried at 70 °C for 10 h. By annealing the acid-corroded H-titanate at 600 °C for 2 h, the anatase TiO<sub>2</sub> nanobelts with rough surface were obtained.

**Synthesis of TiO<sub>2</sub>@MoS<sub>2</sub> structure:** The formation process of TiO<sub>2</sub>@MoS<sub>2</sub> hierarchical structures was described as follows. Typically, 30 mg sodium molybdate (Na<sub>2</sub>MoO<sub>4</sub>·2H<sub>2</sub>O) and 60 mg thioacetamide (C<sub>2</sub>H<sub>5</sub>NS) were dissolved in 20 mL deionized water to form a transparent solution. Then 20 mg TiO<sub>2</sub> nanobelts powder was added into the above solution and stirred to form the suspension. The solution was transferred to a Teflon-lined stainless steel autoclave and then heated in an electric oven at 220 °C for 24 h. A black product, TiO<sub>2</sub>@MoS<sub>2</sub>

structure, was harvested after centrifugation and dried at 50 °C for 12 h. For comparison, pure MoS<sub>2</sub> nanosheets were synthesized under the same conditions without the presence of TiO<sub>2</sub> nanobelts (Figure S1d).

**Characterization:** Field emission scanning electron microscopy (FESEM, Model JSM-7600F, JEOL Ltd., Tokyo, Japan) was used to characterize the morphologies and size of the synthesized samples. The chemical composition was investigated by the energy dispersive spectroscopy (EDS). High resolution transmission electron microscopy (HRTEM) images were carried out with a JOEL JEM 2100F microscope. X-ray powder diffraction (XRD) patterns were recorded on a Bruke D8 Advance powder X-ray diffractometer with Cu K $\alpha$  ( $\lambda$  = 0.15406 nm). X-ray photoelectron spectroscopy (XPS) was performed using an ESCALAB 250.

To evaluate the electrochemical performance of the TiO<sub>2</sub>@MoS<sub>2</sub> structure, coin-type cells were assembled in an Argon-filled glove box. For preparing the working electrodes, the active material, carbon black and carboxyl methyl cellulose (CMC) were mixed in a weight ratio of 80:10:10, and in distilled water and absolute alcohol mixture, stirred at a constant speed for 12 h in order to form a homogeneous slurry, which was spread uniformly on a copper foil. The coated copper foil was cut into round pieces with a diameter of 1 cm, dried at 80 °C in a vacuum overnight. A Celgard 2400 microporous polypropylene membrane was used as a separator. The electrolyte contained a solution of 1 M LiPF<sub>6</sub> in ethylene carbonate/dimethyl carbonate/diethyl carbonate (1:1:1, in wt%). These cells were assembled in the glovebox (Super 1220/750, Switzerland) filled with highly pure argon gas (O<sub>2</sub> and H<sub>2</sub>O levels less than 1 ppm). The cells were aged for 12 h before the measurements to ensure percolation of the electrolyte to the electrodes. The cyclic voltammetry and galvanostatic cycling was performed using an Arbin BT2000 system in the voltage of 0.01-3.0 V (vs Li<sup>+</sup>/Li). Nyquist plots were recorded using a Zahner IM6 electrochemical work station.

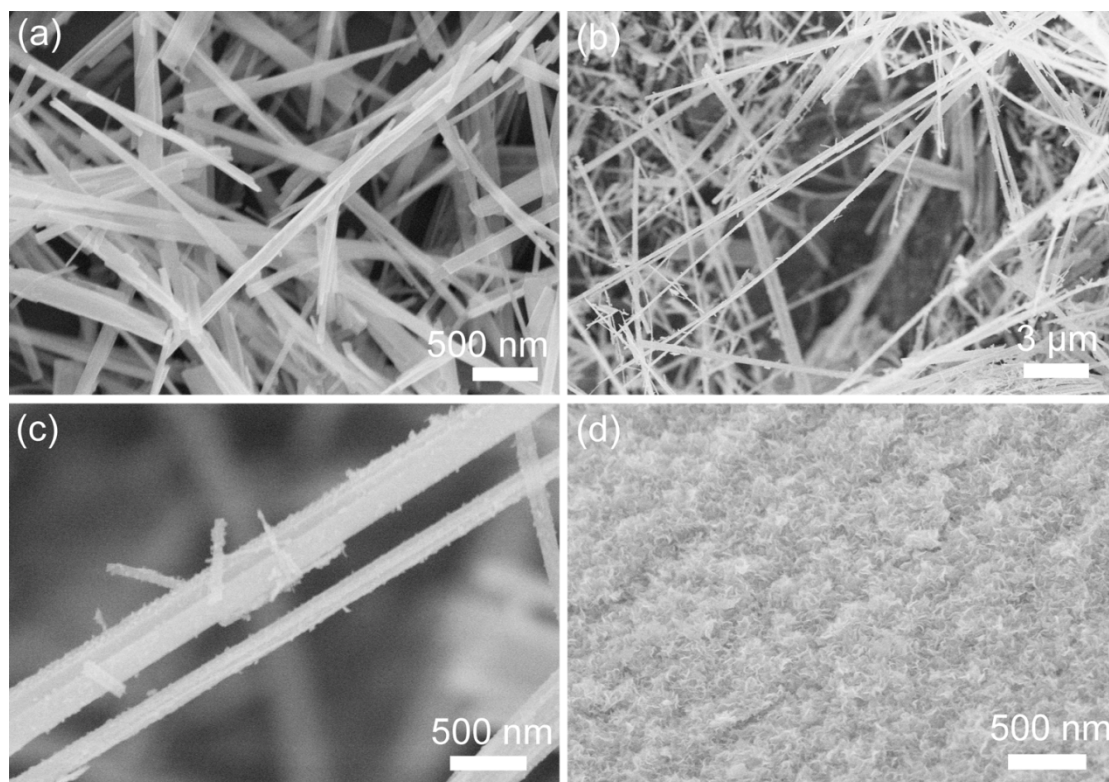

**Figure S1.** SEM images of TiO<sub>2</sub> nanobelts (a) before, (b) and (c) after acid treatment. (d) pure MoS<sub>2</sub> nanosheets.

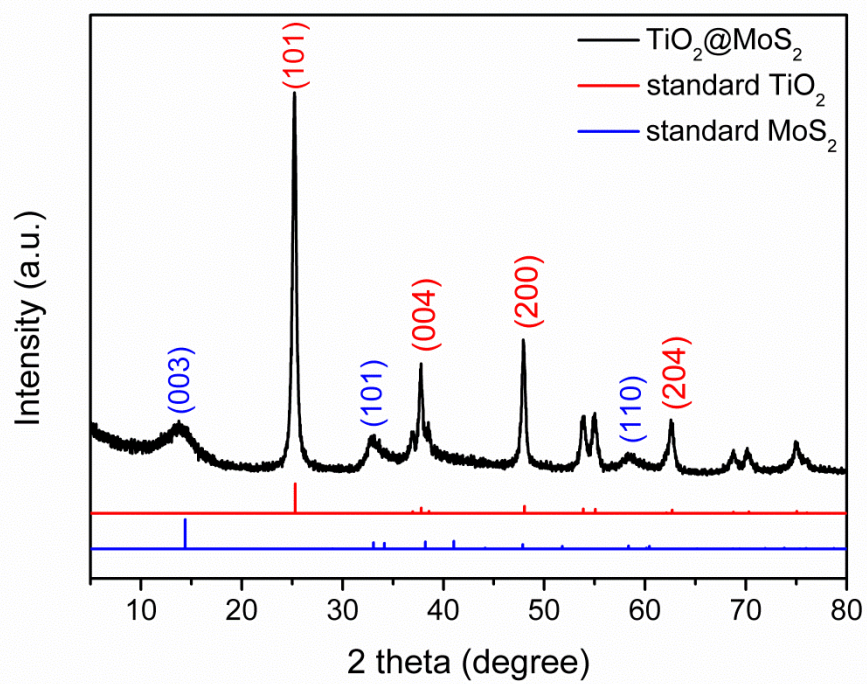

**Figure S2.** XRD patterns of  $\text{TiO}_2@\text{MoS}_2$  structures.

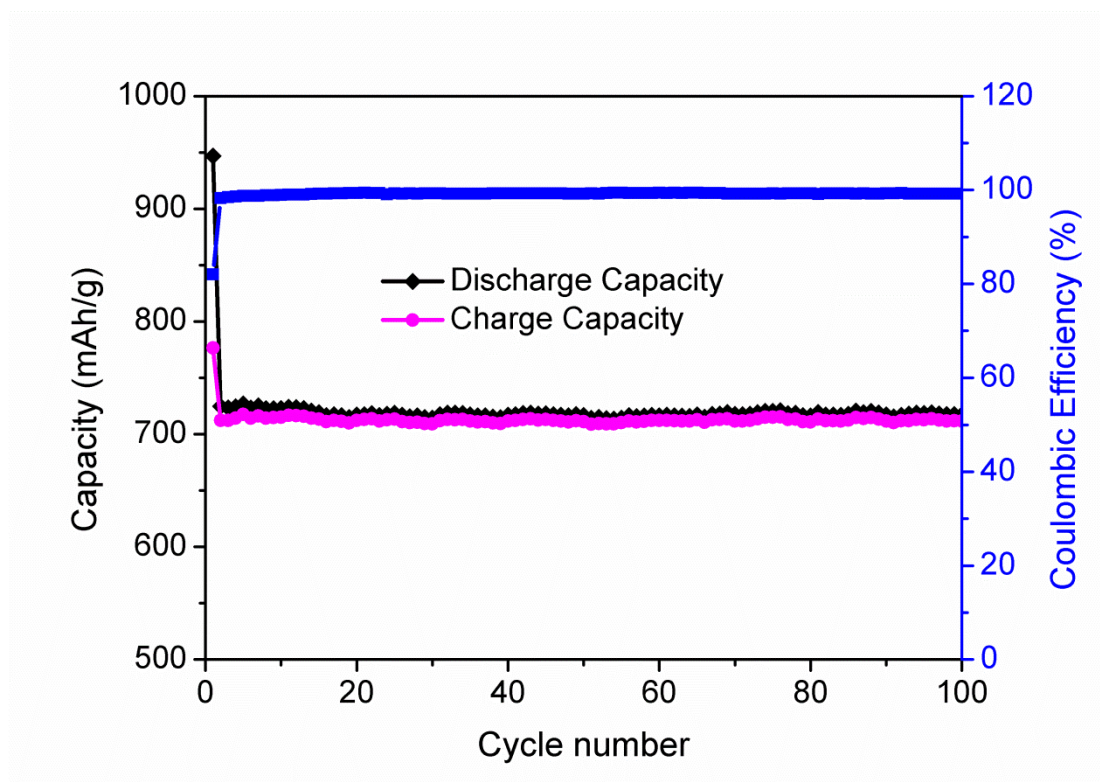

**Figure S3.** Cycling performance and Coulombic efficiency of  $\text{TiO}_2@\text{MoS}_2$  tested at a current density of 100 mA/g in the range of 0.01-3V vs  $\text{Li}^+/\text{Li}$ .

**Table 1** Recently reported Li-ion battery systems based on MoS<sub>2</sub> and TiO<sub>2</sub>

| Materials                                                            | Discharge Capacity (mAh/g)      | Current Density (mA/g) | Ref.      |
|----------------------------------------------------------------------|---------------------------------|------------------------|-----------|
| MoS <sub>2</sub> flakes                                              | 300 (after 60 cycles)           | 100                    | 3         |
|                                                                      | 129                             | 1000                   |           |
| MoS <sub>2</sub> nanoflowers                                         | 531 (after 100 cycles)          | 100                    | 4         |
|                                                                      | 740                             | 400                    |           |
| MoS <sub>2</sub> microsphere                                         | 585 (after 70 cycles)           | 100                    | 5         |
|                                                                      | 353                             | 1000                   |           |
| MoS <sub>2</sub> /Polyaniline                                        | 960 (charge) (after 50 cycles)  | 100                    | 6         |
|                                                                      | 320 (charge)                    | 1000                   |           |
| C-MoS <sub>2</sub>                                                   | 621 (after 80 cycles)           | 200                    | 7         |
|                                                                      | 550                             | 1000                   |           |
| CNT@ MoS <sub>2</sub>                                                | 698 (after 60 cycles )          | 100                    | 3         |
|                                                                      | 369                             | 1000                   |           |
| TiO <sub>2</sub>                                                     | 174 (after 100 cycles)          | 1 C                    | 8         |
|                                                                      | 95                              | 20 C                   |           |
| TO/GS                                                                | 199 (after 100 cycles)          | 1 C                    | 9         |
|                                                                      | 97                              | 50 C                   |           |
| Li <sub>4</sub> Ti <sub>5</sub> O <sub>12</sub> -TiO <sub>2</sub> -C | 110 (after 100 cycles)          | 10 C                   | 10        |
|                                                                      | 166                             | 0.5 C                  |           |
| TiO <sub>2</sub> @TiO <sub>x</sub> N <sub>y</sub> /TiN-GS            | 165 (after 100 cycles)          | C/3                    | 11        |
|                                                                      | 130                             | 12 C                   |           |
| TiO <sub>2</sub> @MoS <sub>2</sub>                                   | 710 (charge) (after 100 cycles) | 100                    | This work |
|                                                                      | 417 (charge)                    | 1000                   |           |

Figure S4 shows the Nyquist plots of initial  $\text{TiO}_2@\text{MoS}_2$  and that after 10 cycles. The diameter of the semi-circle at high frequencies is reduced in the plot of  $\text{TiO}_2@\text{MoS}_2$  after 10 cycles, compared with that of initial  $\text{TiO}_2@\text{MoS}_2$ , indicating the decreased charge-transfer resistance at the electrode/electrolyte interface after 10 cycles. The enhanced conductivity facilitates the electron and  $\text{Li}^+$  ion transfer in the electrode. Moreover, a slope line at the low frequency region represents the Warburg impedance ( $Z_w$ ) caused by the lithium diffusion in electrodes. It is found that the transfer resistance of the initial  $\text{TiO}_2@\text{MoS}_2$  is smaller than that after 10 cycles, which might be attributed to the increased interlayer distance of  $\text{MoS}_2$ .

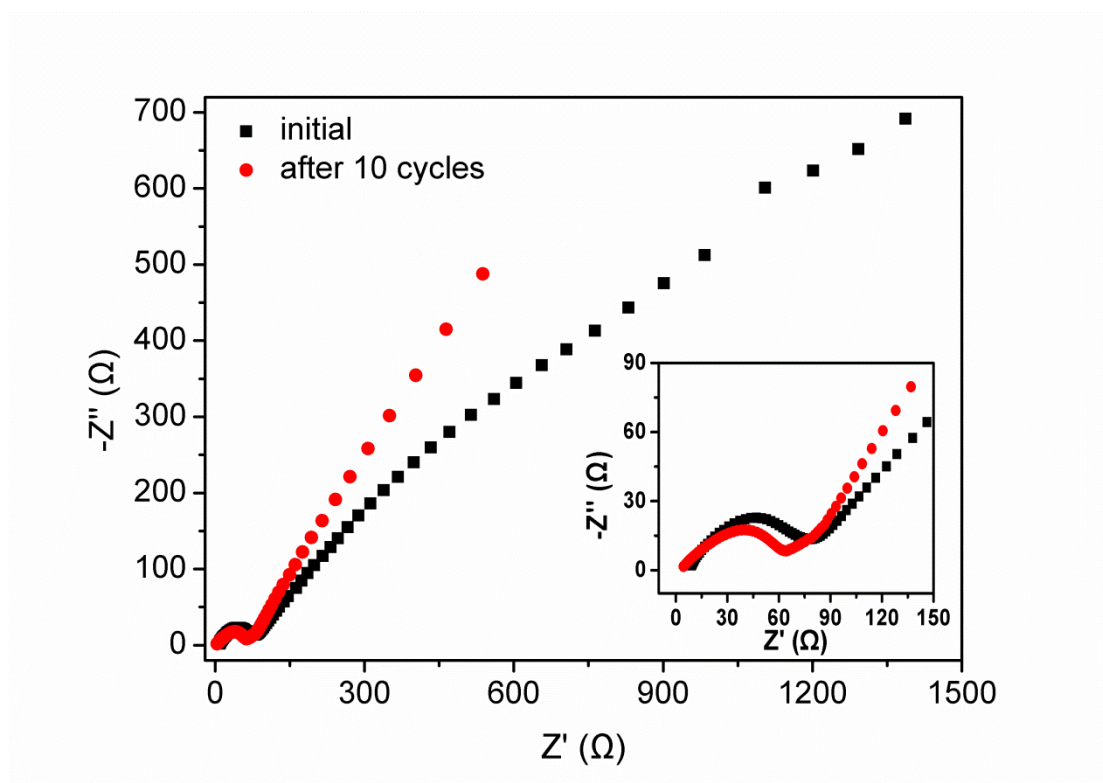

**Figure S4.** Nyquist plots (100 kHz-0.01Hz) of  $\text{TiO}_2@\text{MoS}_2$  for the initial and 10th cycles.

Figure S5 represents the SEM and TEM images of  $\text{TiO}_2@\text{MoS}_2$  after 100 cycles of charge-discharge. It is obvious that even after 100 cycles,  $\text{TiO}_2@\text{MoS}_2$  almost retains its morphological characteristics, indicating that intercalation and conversion reactions of  $\text{TiO}_2@\text{MoS}_2$  are quite reversible.

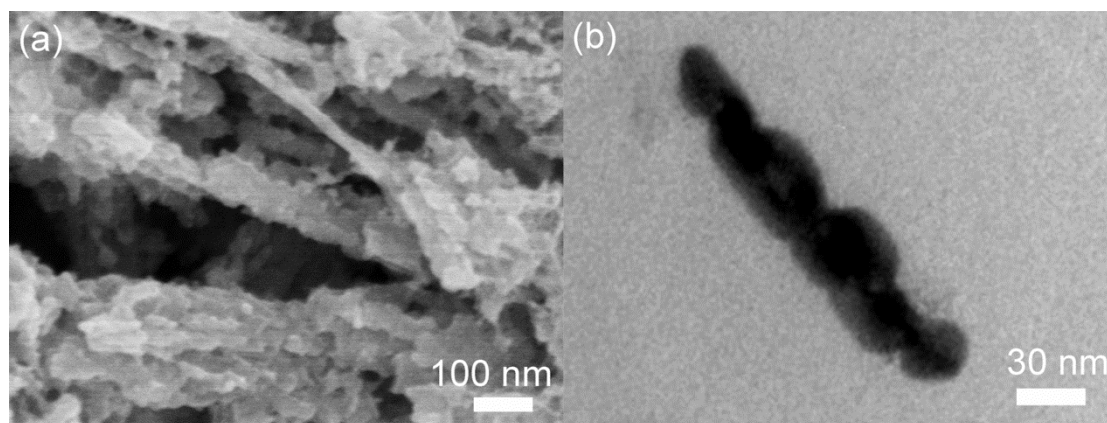

Figure S5. (a) SEM and (b) TEM images of  $\text{TiO}_2@\text{MoS}_2$  after 100 cycles performance as anode in LIBs.



## References

1. W. Zhou, G. Du, P. Hu, G. Li, D. Wang, H. Liu, J. Wang, R. I. Boughton, D. Liu and H. Jiang, *Journal of Materials Chemistry*, 2011, 21, 7937-7945.
2. Y. Wang, G. Du, H. Liu, D. Liu, S. Qin, N. Wang, C. Hu, X. Tao, J. Jiao, J. Wang and Z. L. Wang, *Advanced Functional Materials*, 2008, 18, 1131-1137.
3. S. Ding, J. S. Chen and X. W. Lou, *Chemistry – A European Journal*, 2011, 17, 13142-13145.
4. H. Li, W. Li, L. Ma, W. Chen and J. Wang, *Journal of Alloys and Compounds*, 2009, 471, 442-447.
5. S. Ding, D. Zhang, J. S. Chen and X. W. Lou, *Nanoscale*, 2012, 4, 95-98.
6. L. Yang, S. Wang, J. Mao, J. Deng, Q. Gao, Y. Tang and O. G. Schmidt, *Advanced Materials*, 2013, 25, 1180-1184.
7. C. Zhang, H. B. Wu, Z. Guo and X. W. Lou, *Electrochemistry Communications*, 2012, 20, 7-10.
8. J. S. Chen, Y. L. Tan, C. M. Li, Y. L. Cheah, D. Luan, S. Madhavi, F. Y. C. Boey, L. A. Archer and X. W. Lou, *Journal of the American Chemical Society*, 2010, 132, 6124-6130.
9. N. Li, G. Liu, C. Zhen, F. Li, L. Zhang and H.-M. Cheng, *Advanced Functional Materials*, 2011, 21, 1717-1722.
10. M. M. Rahman, J.-Z. Wang, M. F. Hassan, D. Wexler and H. K. Liu, *Advanced Energy Materials*, 2011, 1, 212-220.
11. Y. Qiu, K. Yan, S. Yang, L. Jin, H. Deng and W. Li, *ACS Nano*, 2010, 4, 6515-6526.
